## References

1. Smith TJ, Staats PS, Deer T, Stearns LJ, Rauck RL, Boortz-Marx RL, Buchser E, Catala E, Bryce DA, Coyne PJ, Pool GE: Randomized clinical trial of an implantable drug delivery system compared with comprehensive medical management for refractory cancer pain: Impact on pain, drug-related toxicity, and survival. *J Clin Oncol* 2002; 20:4040-9
2. Deer T, Chapple I, Classen A, Javery K, Stoker V, Tonder L, Burchiel K: Intrathecal drug delivery for treatment of chronic low back pain: Report from the National Outcomes Registry for Low Back Pain. *Pain Med* 2004; 5:6-13
3. Turner MS: Intrathecal drug delivery 2002. *Acta Neurochir Suppl* 2003; 87:29-35
4. Coffey RJ, Burchiel K: Inflammatory mass lesions associated with intrathecal drug infusion catheters: Report and observations on 41 patients. *Neurosurgery* 2002;50:78-86
5. Allen JW, Horais KA, Tozier NA, Wegner K, Corbeil JA, Mattrey RF, Rossi SS, Yaksh TL: Time course and role of morphine dose and concentration in intrathecal granuloma formation in dogs: A combined magnetic resonance imaging and histopathology investigation. *ANESTHESIOLOGY* 2006; 105:581-9
6. Coffey RJ, Owens ML, Broste SK, Dubois MY, Ferrante FM, Schultz DM, Stearns LJ, Turner MS: Mortality associated with implantation and management of intrathecal opioid drug infusion systems to treat noncancer pain. *ANESTHESIOLOGY* 2009; 111:881-91
7. Rathmell JP, Lair TR, Nauman B: The role of intrathecal drugs in the treatment of acute pain. *Anesth Analg* 2005; 101:S30-43
8. Kato R, Shimamoto H, Terui K, Yokota K, Miyao H: Delayed respiratory depression associated with 0.15 mg intrathecal morphine for cesarean section: A review of 1915 cases. *J Anesth* 2008; 22:112-6
9. Shapiro A, Zohar E, Zaslansky R, Hoppenstein D, Shabat S, Fredman B: The frequency and timing of respiratory depression in 1524 postoperative patients treated with systemic or neuraxial morphine. *J Clin Anesth* 2005; 17:537-42
10. Mercadante S: Neuraxial techniques for cancer pain: An opinion about unresolved therapeutic dilemmas. *Reg Anesth Pain Med* 1999; 24:74-83
11. Horlocker TT, Burton AW, Connis RT, Hughes SC, Nickinovich DG, Palmer CM, Pollock JE, Rathmell JP, Rosenquist RW, Swisher JL, Wu CL: Practice guidelines for the prevention, detection, and management of respiratory depression associated with neuraxial opioid administration. *ANESTHESIOLOGY* 2009; 110: 218-30
12. American Society of Health-System Pharmacists: Proceedings of a summit on preventing patient harm and death from i.v. medication errors. *Am J Health-Syst Pharm* 2008;65:2367-79

## ANESTHESIOLOGY REFLECTIONS

### The Cotton-Boothby Apparatus

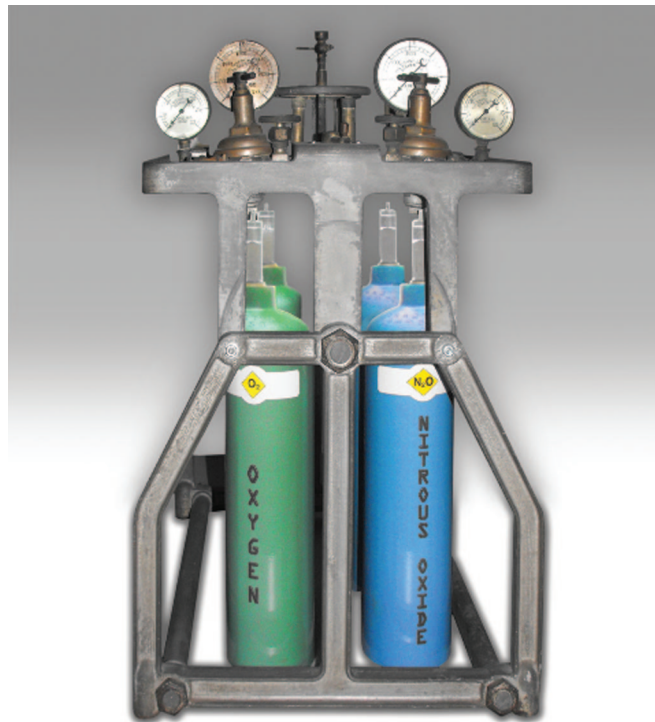

Drs. Frederic J. Cotton (1869–1938) and Walter M. Boothby (1880–1953) published in 1912 their use of a “bubble bottle” for sight measurement of gas flows. Finally making flow rates and gas proportioning possible, their concept was adopted by Gwathmey in the United States and by Marshall and Boyle in the United Kingdom. The original production model of the Cotton-Boothby Apparatus (above, donated by Cotton to Wood Library-Museum [WLM] Founder Paul Wood) has been continuously displayed at the WLM except from 1977–1987. That decade witnessed an American Society of Anesthesiologists’ expansion at Busse Highway that not only demolished the WLM Gallery but also left this venerable apparatus buried under a wooden crate. (Copyright © the American Society of Anesthesiologists, Inc. This image appears in color in the *Anesthesiology Reflections* online collection available at [www.anesthesiology.org](http://www.anesthesiology.org).)

George S. Bause, M.D., M.P.H., Honorary Curator, ASA’s Wood Library-Museum of Anesthesiology, Park Ridge, Illinois, and Clinical Associate Professor, Case Western Reserve University, Cleveland, Ohio. [UJYC@aol.com](mailto:UJYC@aol.com).
